# Supplementary material
Source: Springer Nature journal article supplement (https://www.springermedizin.de/resource/supplementary/12890_2011_316_MOESM5_ESM.pdf/9504934)

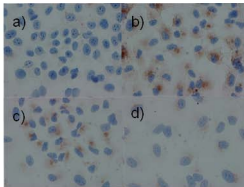

e)

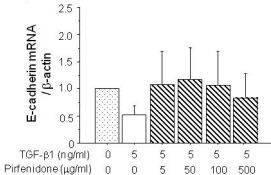

Supplement: MOESM5 [file 9504934]
